# Supplementary material
Source: HighWire-hosted journal article supplement (http://www.cmajopen.ca/highwire/filestream/80755/field_highwire_adjunct_files/0/open-2013-0070-1-at.pdf)
Supplement: open-2013-0070-1-at.pdf [file open-2013-0070-1-at.pdf]

**Appendix 1 (as supplied by the authors): Reasons why respondents would be unwilling to use email/text messaging**

| Unwilling to use email      | Total % (95% CI) <sup>†</sup> | Unwilling to use text messaging | Total % (95% CI) <sup>†</sup> |
|-----------------------------|-------------------------------|---------------------------------|-------------------------------|
| Don't know how to use email | 51.5 (45.7 - 57.2)            | Don't know how to use SMS       | 48.4 (43.4 - 53.5)            |
| Don't like to use email     | 6.3 (3.6 - 10.8)*             | Don't like to use SMS           | 10.5 (7.5 - 14.6)*            |
| Email is not private        | 3.5 (1.9 - 6.2)*              | SMS is not private              | 8.5 (5.9 - 11.9)*             |
| Don't think email useful    | 8.0 (5.4 - 11.7)*             | Don't think SMS useful          | 17.5 (13.5 - 22.3)            |
| Not secure                  | 9.5 (5.7 - 15.6)*             | Find SMS annoying to use        | 3.0 (1.9 - 4.9)*              |
| Want to talk to doctor      | 27.0 (22.1 - 32.6)            | Costly                          | 2.0 (0.7 - 5.8)**             |
| No time to read email       | 0.5 (0.1 - 1.1)**             | No time to read SMS             | 0.5 (0.2 - 1.2)**             |

<sup>†</sup>All proportions and 95% CIs are weighted and bootstrapped as per Statistics Canada guidelines; \*CV = 16%–33.3%; \*\* CV > 33.3%
